# Supplementary material for: Solution-processed orange and white OLEDs sensitized by an electroactive pure organic room-temperature phosphorescent polymer
Source: Royal Society of Chemistry journal article supplement (doi:10.1039/d3ma00326d), 2023-01-01
Supplement: d3ma00326d1.pdf [file d3ma00326d1.pdf]

## Supporting Information

### **Solution-processed orange and white OLEDs sensitized by an electroactive pure organic room-temperature phosphorescence polymer**

Yiting Tian,<sup>a</sup> Renze He,<sup>b</sup> Guoyun Meng,<sup>b,\*</sup> Shumeng Wang,<sup>c,\*</sup> Lei Zhao,<sup>c</sup> Junqiao  
Ding<sup>b,d,\*</sup>

<sup>a</sup>School of Materials and Energy, Yunnan University, Kunming 650091, P. R. China.

<sup>b</sup>School of Chemical Science and Technology, Yunnan University, Kunming 650091,  
P. R. China. E-mail: mengguoyun@outlook.com; dingjunqiao@ynu.edu.cn

<sup>c</sup>State Key Laboratory of Polymer Physics and Chemistry, Changchun Institute of  
Applied Chemistry, Chinese Academy of Sciences, Changchun, 130022, P. R. China.  
E-mail: wangshumeng@ciac.ac.cn

<sup>d</sup>Southwest United Graduate School, Kunming 650092, P. R. China.

## 1. Experimental Section

**1.1. General Information.** PEDOT: PSS (Clevios P CH 8000) was purchased from Heraeus Precious Metals GmbH Co. KG. PFI (Nafion,  $\geq 1.00$  meq/g exchange capacity) was purchased from Alfa-Aesar. P(DMPAc-O-TPTrz) was synthesized in our laboratory according to previously reported methods. TBRb 2,8-Di-tert-butyl-5,11-bis(4-tert-butylphenyl)-6,12-diphenyltetracene, TSPO1 (diphenyl-4-triphenylsilylphenyl-phosphine oxide), TmPyPB (Tri(m-pyridin-3-ylphenyl)benzene, 1,3,5-Tris(3-pyridyl-3-phenyl)benzene), mCP (1,3-bis(carbazol-9-yl)benzene), and LiF was bought from Luminescence Technology Corp.

**1.2. Measurements and characteristics.** Cyclic voltammetry (CV) measurements were recorded on an EG&G 283 potentiostat/galvanostat system from Princeton Applied Research. The UV–Vis absorption spectra were recorded by using a PerkinElmer Lambda 35 UV-vis spectrometer. The photoluminescence (PL) spectra and low-temperature phosphorescence spectra were measured by using a Horiba Instruments Inc. FL3C-111 fluorescence spectrometer. And the film samples were prepared by spin-coating the mCP, sensitizer, and dyes mixed solutions on the quartz substrate. The low-temperature phosphorescence spectra were obtained at 77 K under vacuum with a delay time of 0.01 ms to remove the fluorescent component. Transient PL spectra decay characteristics were recorded using a DeltaFlex™ Modular Fluorescence Lifetime System (Horiba Scientific) with an excitation wavelength of 300 nm in N<sub>2</sub>.

**1.3. Device fabrication and testing.** The solution-processed devices were fabricated with a

configuration is ITO/PEDOT:PSS (Al 8000) (40 nm)/EML (30 nm)/TSPO1(8 nm) /TmPyPB (42 nm)/LiF (1 nm)/Al (150 nm). First, the cleaned ITO-coated substrates (15  $\Omega$  per square) were treated with Ultraviolet-ozone (UVO) for 1.5 hours. Secondly, the PEDOT: PSS (Clevios CH 8000) was spin-coated on the substrate in the air at a speed of 7000 rpm, annealed at 120°C for 1 hour, and then transferred into a nitrogen-filled glove box. Subsequently, the 30 nm EML was spin-coated onto the PEDOT: PSS layer from its chlorobenzene solution at a speed of 1800 rpm, then annealed at 100 °C for 10 minutes. After being transferred into a vacuum chamber, other functional layers including 8 nm TSPO1, 42 nm TmPyPB, 1 nm LiF, and 150 nm Al were thermally deposited layer-by-layer in sequence at a pressure under  $3 \times 10^{-4}$  Pa. The current density–voltage–luminance (J-V-L) characteristics of all fabricated devices were measured using Keithley 2000 and Keithley 2400 (fitted with calibrated silicon photodiode) systems. The EL spectra and CIE coordinates were measured using a CS2000 spectrometer. EQE was calculated from the EL spectrum, luminance, and current density assuming a Lambertian emission distribution. All the measurements were performed at room temperature and air atmosphere.

**1.4. Calculation of Förster Energy Transfer.** The Förster energy transfer process from P(DMPAc-O-TPTrz) to TBRb was quantitatively evaluated. Firstly, we calculated the molar extinction coefficient of TBRb by UV-Vis absorption spectroscopy using the Lambert-Bier law.

$$A = \varepsilon CL\#(S - 1)$$

In equation (**S-1**), A is the absorbance at the peak position of the first exciton absorption

peak.  $C$  is the molar concentration of dyes (mol/L).  $L$  is the optical path length of about 1 cm.  $\varepsilon$  is the molar extinction coefficient (L/(mol·cm)).

Secondly, the Förster energy transfer radius ( $R_0$ ) is calculated by the expression:

$$R_0^6 = \frac{9000(\ln 10)k^2\phi_{PL}}{128\pi^5N_A n^4} \int_0^\infty Fh(\lambda)\varepsilon g(\lambda)\lambda^4 d\lambda \#(S-2)$$

In equation (S-2),  $\Phi_{PL}$  is PLQY of sensitizer host,  $\kappa^2$  is the transition dipole orientation factor with the value of 2/3,  $n$  is the refractive index with the value of 1.7,  $N_A$  is Avogadro's

number,  $\int_0^\infty Fh(\lambda)\varepsilon g(\lambda)\lambda^4 d\lambda$  is the overlap integral between the PL of sensitizer and the absorption of the guest. In the overlap integral,  $Fh(\lambda)$  stands for the normalized donor emission spectrum, and  $\varepsilon g(\lambda)$  is the molar absorption coefficient of the acceptor.

Thirdly, the average distance between sensitizer and dopant ( $R_{DA}$ ) was calculated following the expression:

$$R_{DA} = \left(\frac{4\pi}{3}N_G\right)^{-\frac{1}{3}} N_G = \beta\rho N_A M_C \#(S-3)$$

In equation (S-3), Where  $NG$  is the quantity of guest material in a unit volume, which is in direct proportion to the guest doping concentration.  $\beta$  is the fraction of the guest material,  $\rho$  is the density of the film assumed to be 1 g cm<sup>-3</sup>,  $N_A$  is the Avogadro's number and  $M_C$  is the molecular weight of the guest material.

## 2. Supplementary figures and tables

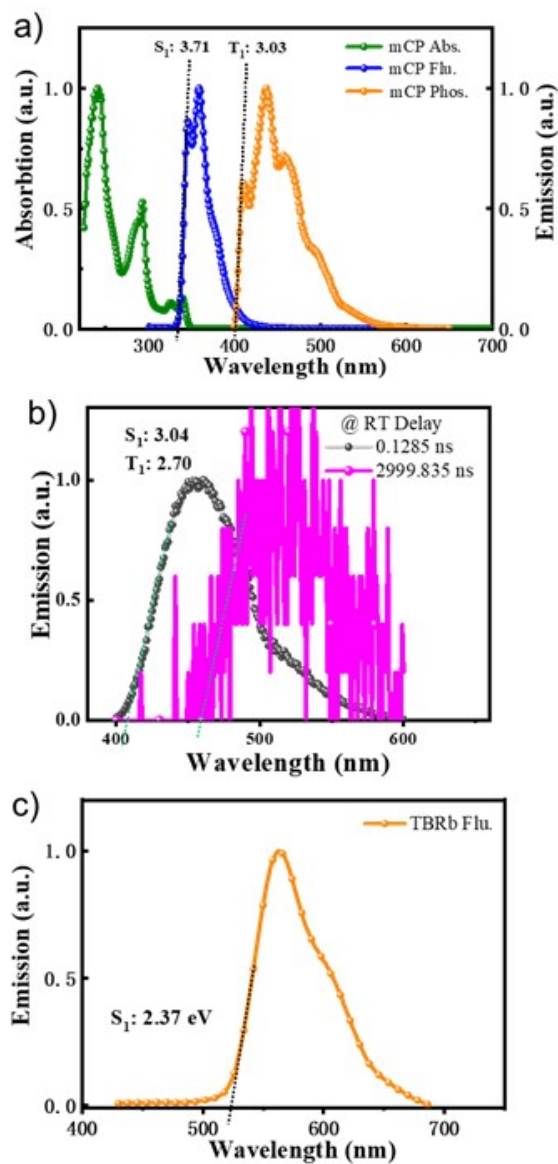

**Figure S1.** (a) UV-vis absorption, fluorescence and phosphorescence spectra at 77 K for mCP; (b) Time resolved PL spectra for P(DMPAc-O-TPTrz). The curves at 0.1285 and 2999.835 ns are taken as the fluorescence and phosphorescence spectra, respectively; (c) PL spectra of TBRb.

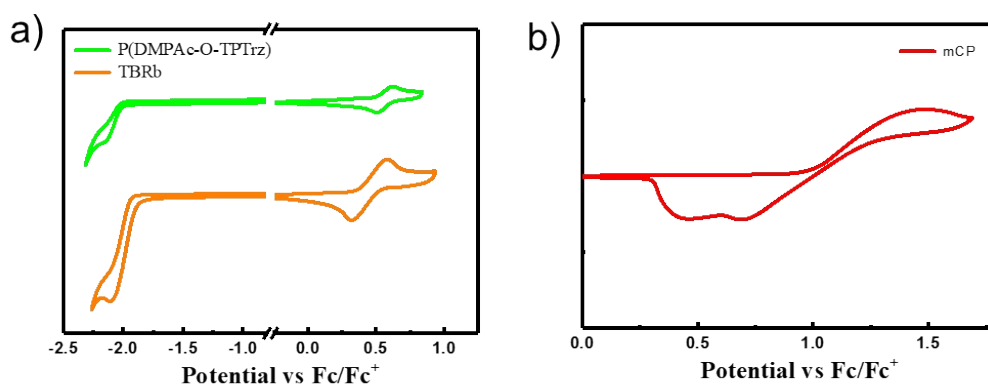

**Figure S2.** Cyclic voltammogram traces for P(DMPAc-O-TPTrz) and TBRb (a), and mCP (b) in dichloromethane solution using 0.1 M  $n\text{-Bu}_4\text{NClO}_4$  as supporting electrolyte at a scan rate of 50 mV/s.

**Table S1.** Summary of photophysical and electrochemistry properties for used materials in solution-processed PSF.

| Used materials   | $E_{S1}^a$<br>[eV] | $E_{T1}^b$<br>[eV] | $\Delta E_{ST}^c$<br>[eV] | HOMO <sup>d</sup><br>[eV] | LUMO <sup>d</sup><br>[eV] |
|------------------|--------------------|--------------------|---------------------------|---------------------------|---------------------------|
| mCP              | 3.71               | 3.09               | 0.56                      | -5.73                     | -2.40 <sup>e</sup>        |
| P(DMPAc-O-TPTrz) | 3.04               | 2.70               | 0.34                      | -5.31                     | -2.84                     |
| TBRb             | 2.50               | n. d.              | -                         | -5.18                     | -2.90                     |

<sup>a</sup>Singlet energy estimated from the onset of the fluorescence spectrum (298 K); <sup>b</sup>Triplet energy estimated from the onset of the phosphorescence spectrum (77 K); <sup>c</sup> $\Delta E_{ST} = E_{S1} - E_{T1}$ ; <sup>d</sup>Determined from cyclic voltammetry by the formula:  $E_{HOMO} = -(E_{ox} + 4.8)$  eV,  $E_{LUMO} = -(E_{re} + 4.8)$  eV, where  $E_{ox}$  and  $E_{re}$  are the onset values of the first oxidation and reduction waves, respectively; <sup>e</sup>Taken from the literature.

**Table S2.** Summary of photophysical parameters for doped films based on mCP: 15 wt.% P(DMPAc-O-TPTrz): x wt.% TBRb.

| TBRb content<br>(x wt.%) | $\tau_F^a$<br>(ns) | $\tau_P^a$<br>(ns) | $R_{DA}^b$<br>(nm) | $R_0^c$<br>(nm) |
|--------------------------|--------------------|--------------------|--------------------|-----------------|
| x = 0                    | 13.57              | 1501.43            | -                  | -               |
| x = 0.2                  | 4.70               | 1273.81            | 5.32               |                 |
| x = 0.3                  | 4.21               | 1135.64            | 4.64               |                 |
| x = 0.4                  | 3.88               | 1074.32            | 4.22               |                 |
| x = 1.0                  | 3.63               | 990.60             | 3.11               | 2.11            |
| x = 3.0                  | 3.20               | 901.24             | 2.16               |                 |
| x = 5.0                  | 2.91               | 892.77             | 1.82               |                 |

<sup>a</sup>Fluorescence and room-temperature phosphorescence lifetimes estimated from the transient PL spectra; <sup>b</sup>Intermolecular distance between P(DMPAc-O-TPTrz) and TBRb; <sup>c</sup> Förster energy transfer radius from P(DMPAc-O-TPTrz) to TBRb.



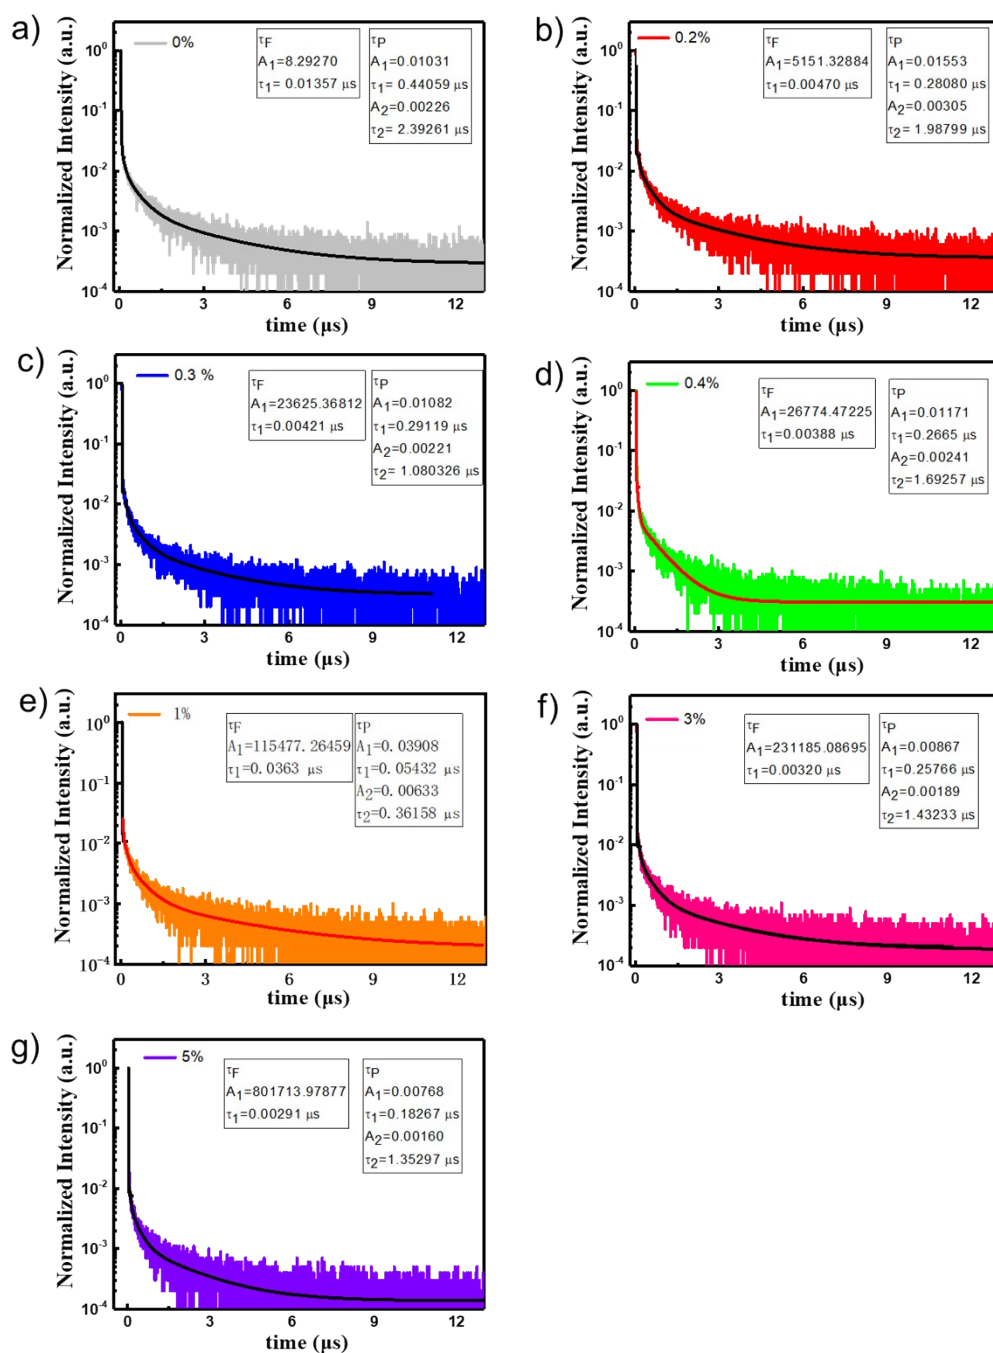

**Figure S3.** Transient PL spectra together with triexponential fittings for doped films based on mCP: 15 wt.% P(DMPAc-O-TPrz): x wt.% TBRb films, where x is 0 (a), 0.2 (b), 0.3 (c), 0.4 (d), 1.0 (e), 3.0 (f) and 5.0 (g).

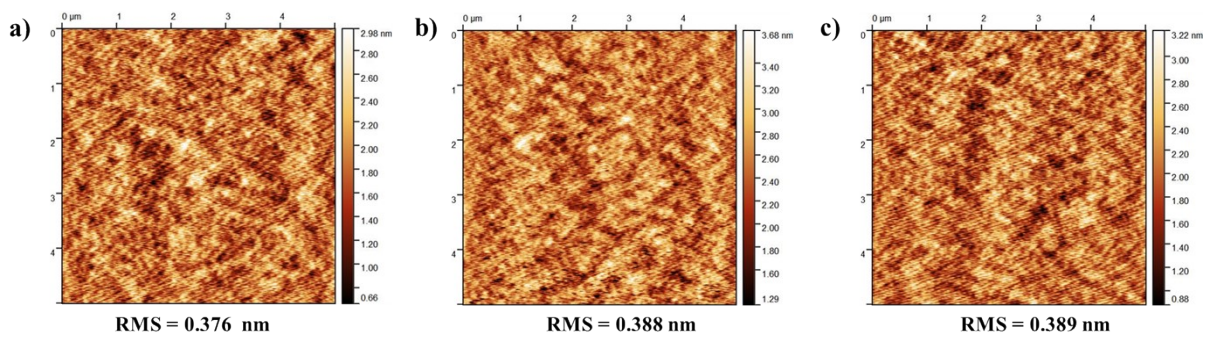

**Figure S4.** AFM morphology images on ITO/PEDOT: PSS substrate for (a) mCP: 15 wt.% P(DMPAc-O-TPTrz); (b) mCP: 15 wt.% P(DMPAc-O-TPTrz): 0.2 wt.% TBRb; (c) mCP: 15 wt.% P(DMPAc-O-TPTrz): 1.0 wt.% TBRb.

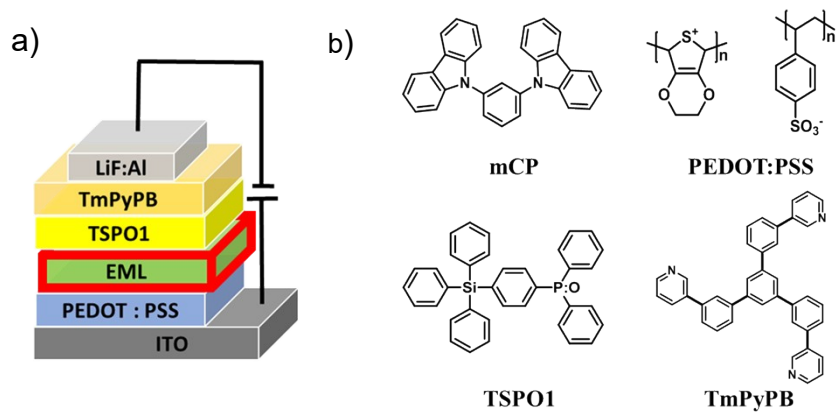

**Figure S5.** Device configuration (a) and molecular structures of used materials.

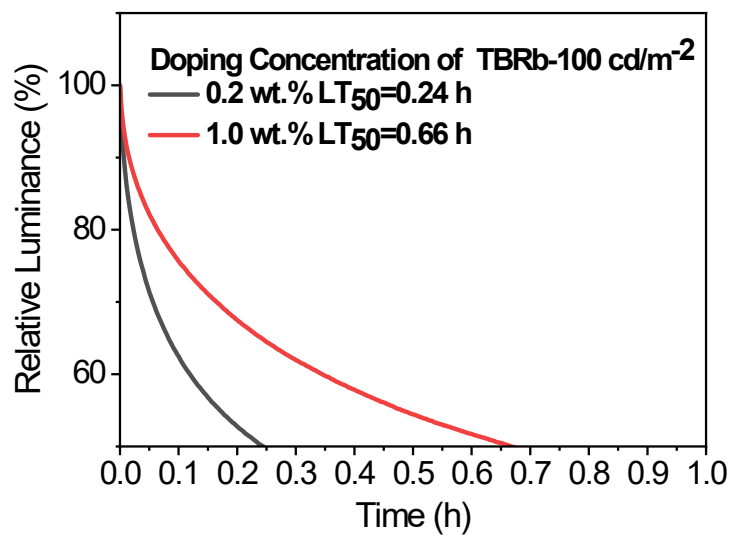

**Figure S6.** The operational lifetimes of the devices based on the structure of mCP: 15 wt.% P(DMPAc-O-TPTrz): x wt.% TBRb with initial luminance at 100 cd/m<sup>2</sup>.

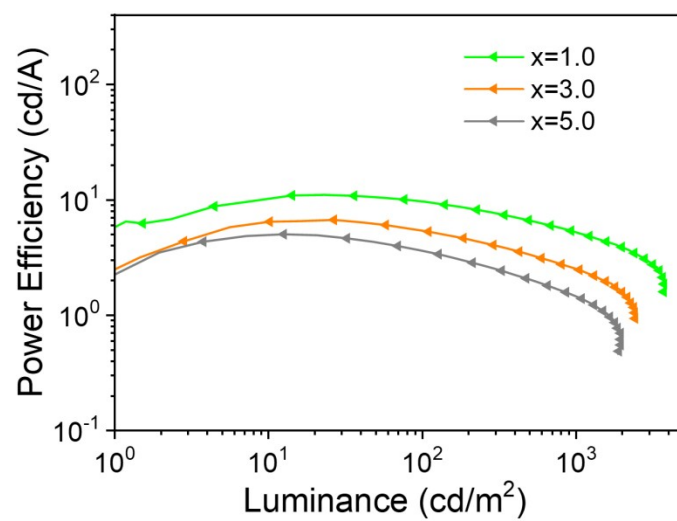

**Figure S7.** Power efficiency as a function of luminance for solution-processed orange OLEDs.

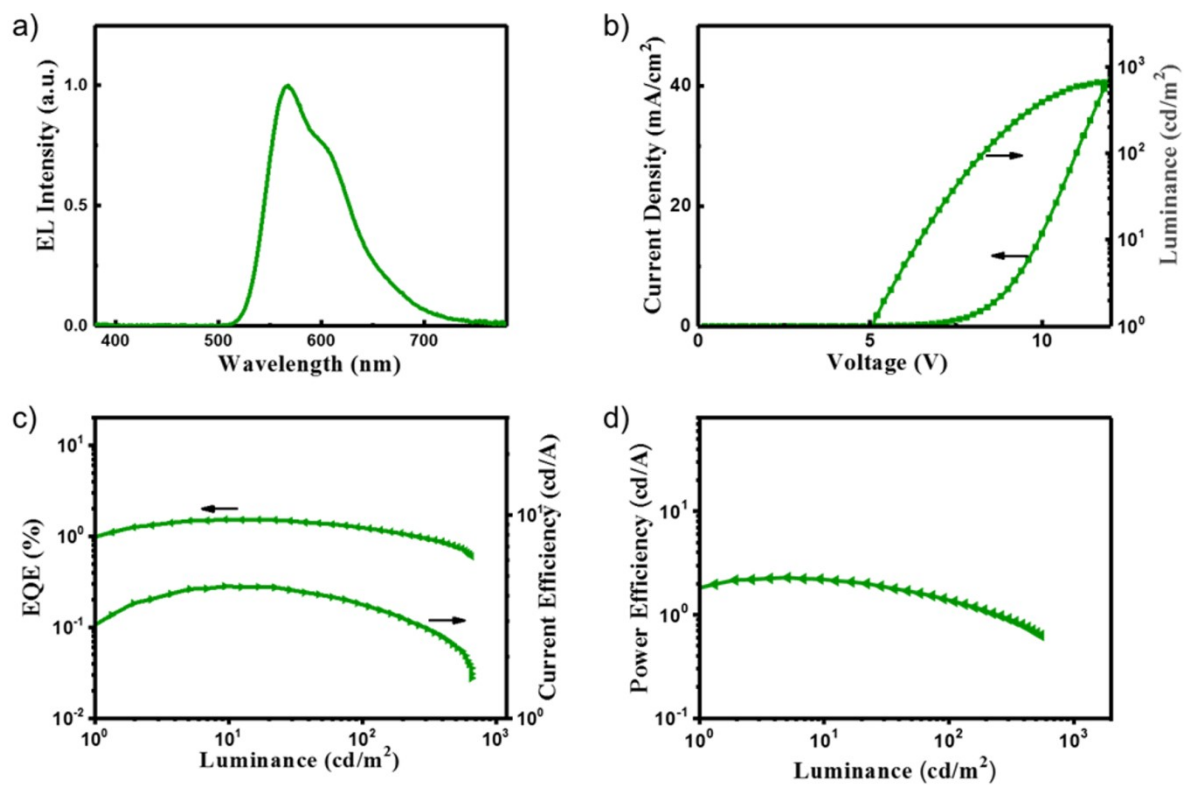

**Figure S8.** Control device performance for mCP: 5 wt.%TBRb: (a) EL spectra at 1000 cd/m<sup>2</sup>; (b) current density-voltage-luminance characteristics; (c) EQE and current efficiency as a function of luminance; (d) Power efficiency as a function of luminance.

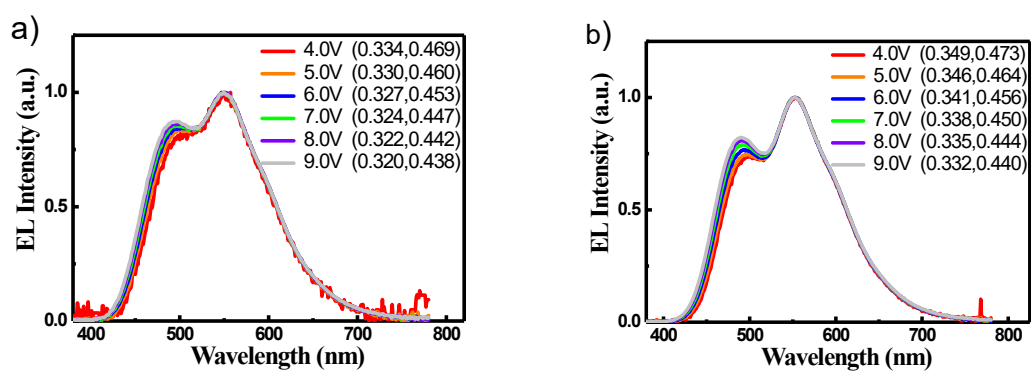

**Figure S9.** Driving voltage dependence on EL spectra for solution-processed white OLEDs based on mCP: 15 wt% of P(DMPAc-O-TPrz): x wt% TBRb, where x is 0.3 (a), and 0.4 (b).

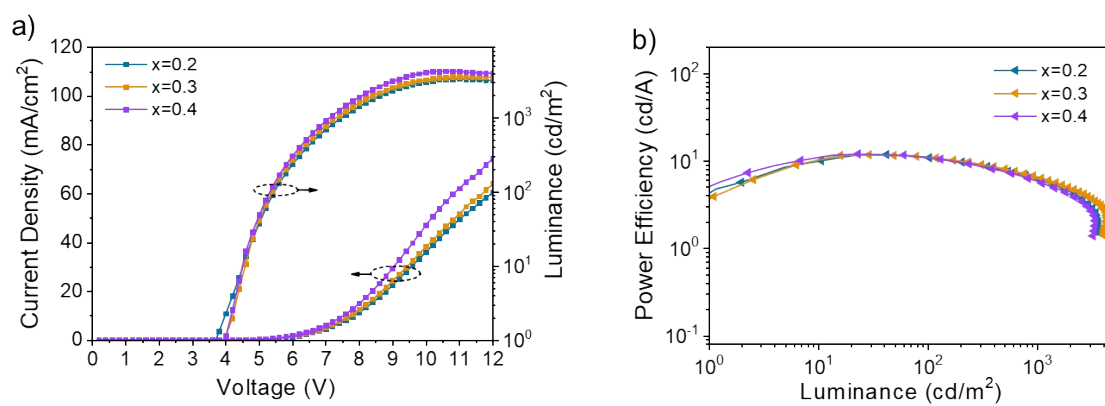

**Figure S10.** Current density-voltage-luminance characteristics (a), and power efficiency as a function of luminance (b) for solution-processed white OLEDs.
